# Supplementary material for: Alkylphenols to phenol and olefins by zeolite catalysis: a pathway to valorize raw and fossilized lignocellulose
Source: Royal Society of Chemistry journal article supplement (doi:10.1039/c5gc01868d), 2015-08-17
Supplement: c5gc01868d1.pdf [file c5gc01868d1.pdf]

Supporting information

**Alkylphenols to phenol and olefins by zeolite catalysis:  
a pathway to valorize raw and fossilized lignocellulose**

Danny Verboekend, Yuhe Liao, Wouter Schutyser, and Bert Sels

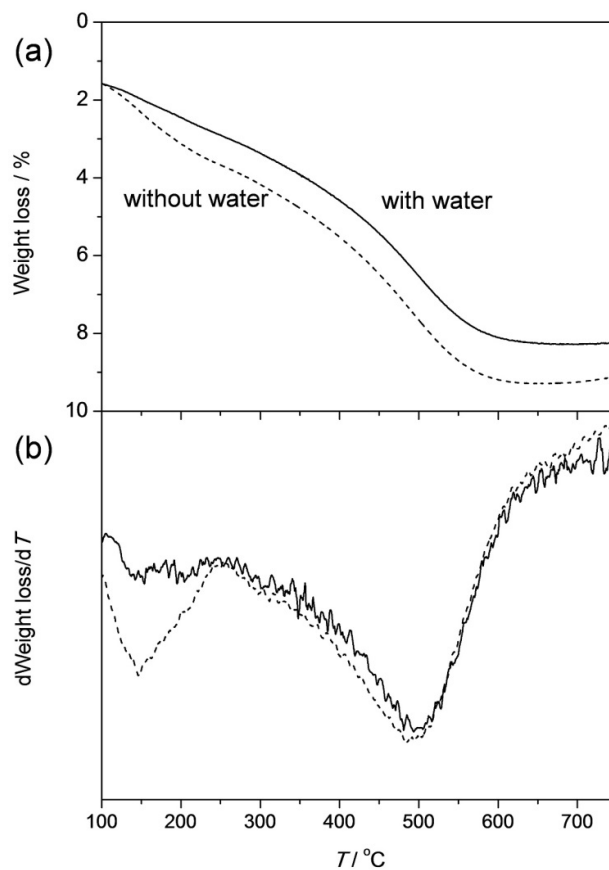

**Figure S11.** Thermo-gravimetric analyses of spent ZSM5-40 catalysts derived from dealkylation experiments in the absence and presence of water (**Figure 1a**).

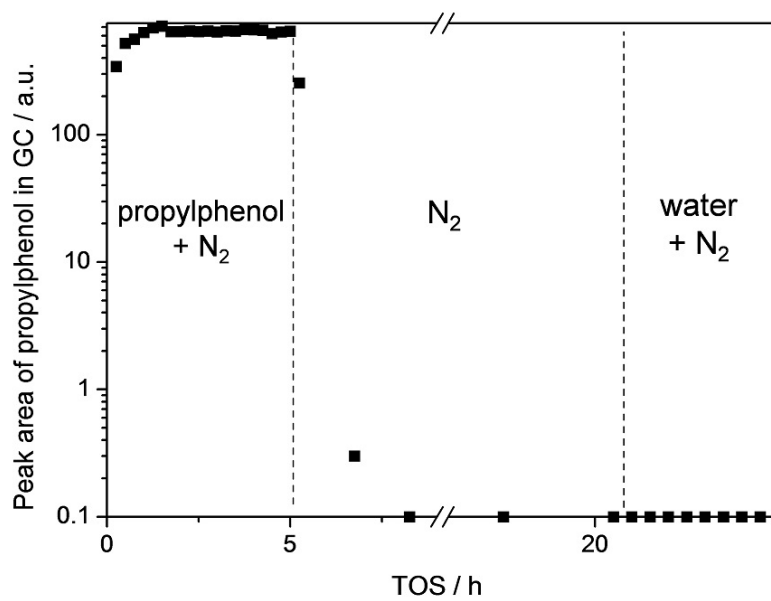

**Figure SI2.** Peak area of 4-*n*-propylphenol as analysed by GC over a ZSM5-40 catalyst as a function of TOS in different conditions. The absence of propylphenol or water was compensated with nitrogen to maintain a constant flow.  $T = 305^{\circ}\text{C}$  and  $\text{WHSV} = 3.7 \text{ h}^{-1}$ .

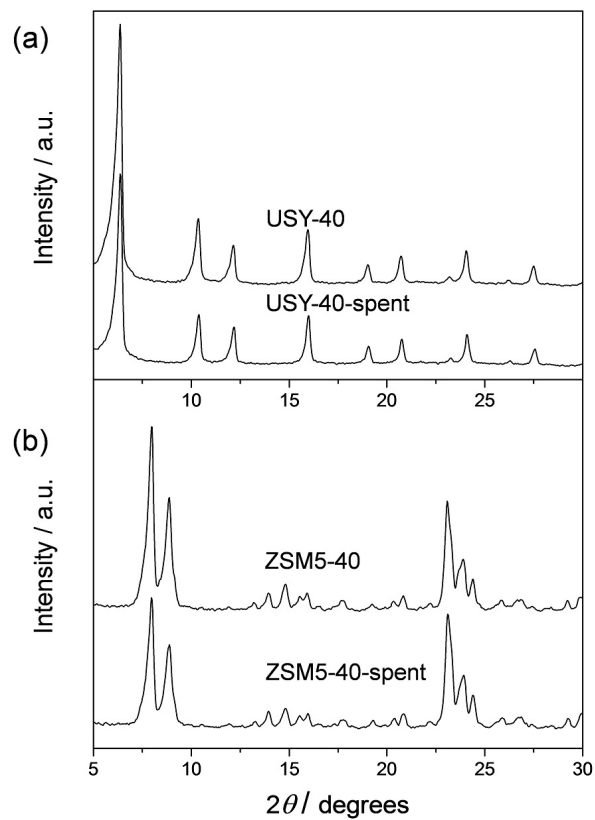

**Figure S13.** X-ray diffraction patterns of fresh and spent USY (a) and ZSM-5 (b) zeolites derived from dealkylation experiments in **Figure 3**.

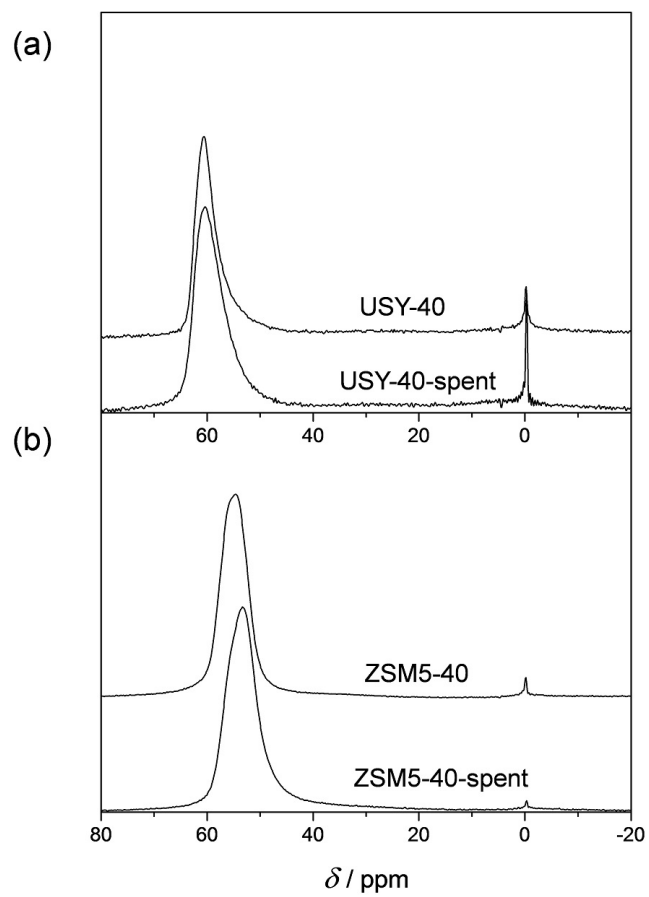

**Figure SI4.**  $^{27}\text{Al}$  MAS NMR spectra of fresh and spent USY (a) and ZSM-5 (b) zeolites derived from dealkylation experiments in **Figure 3**.

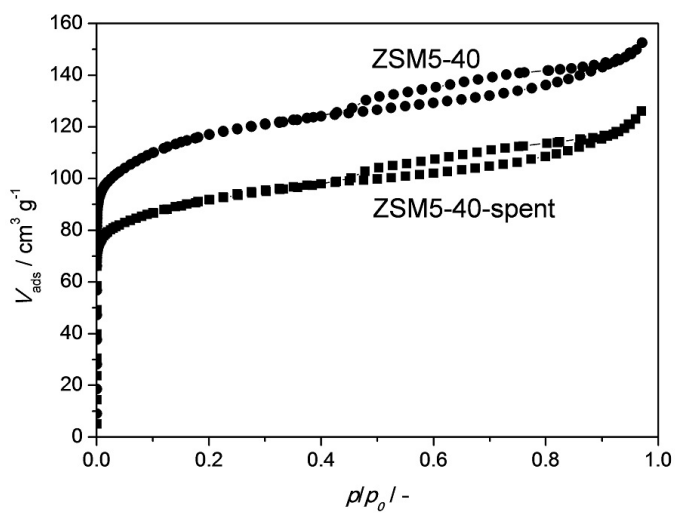

**Figure SI5.**  $\text{N}_2$  isotherms of fresh and spent ZSM5-40 derived from dealkylation experiments in **Figure 3**.

**Table S1.** The yield of phenol from lignocellulose of reported technique.

| Technique                     | Solvent                   | Catalysts                                                            | Phenol yield (wt%) | Ref. |
|-------------------------------|---------------------------|----------------------------------------------------------------------|--------------------|------|
| pyrolysis/<br>solvolysis      | formic acid<br>alcohol    | -                                                                    | <1                 | 1    |
| pyrolysis/<br>solvolysis      | formic acid<br>alcohol    | -                                                                    | <1                 | 2    |
| pyrolysis                     | -                         | -                                                                    | 1                  | 3    |
| depolymerization              | water/butanol             | -                                                                    | <5                 | 4    |
| depolymerization              | water butanol             | -                                                                    | <1                 | 5    |
| catalytic depolymerization    | ethanol                   | CuMgAlO <sub>x</sub>                                                 | <1                 | 6    |
| catalytic fast pyrolysis      | -                         | zeolite                                                              | <2                 | 7    |
| catalytic depolymerization    | formic acid, water        | Pd/C                                                                 | <2                 | 8    |
| catalytic depolymerization    | alcohol                   | Ni/C                                                                 | <1                 | 9    |
| catalytic depolymerization    | formic acid, ethanol      | Pt/C                                                                 | <2                 | 10   |
| catalytic depolymerization    | water                     | NaOH                                                                 | <1                 | 11   |
| pyrolysis                     | -                         | ZSM5                                                                 | <2                 | 12   |
| Pyrolysis                     | -                         | -                                                                    | <1                 | 13   |
| catalytic depolymerization    | ethanol and water         | Pt/Al <sub>2</sub> O <sub>3</sub> and acid or base                   | <1                 | 14   |
| catalytic depolymerization    | water                     | Pt/Al <sub>2</sub> O <sub>3</sub> and H <sub>2</sub> SO <sub>4</sub> | <1                 | 15   |
| catalytic depolymerization    | water and tetrahydrofuran | -                                                                    | <1                 | 16   |
| catalytic depolymerization    | water                     | KOH                                                                  | 1                  | 17   |
| catalytic depolymerization    | methanol                  | NaOH and Ru/C                                                        | 3                  | 18   |
| catalytic depolymerization    | water                     | NaOH                                                                 | 1                  | 19   |
| solvolytic depolymerization   | water and methanol        | NaOH/HZSM5                                                           | <7                 | 20   |
| catalytic depolymerization    | water                     | Na <sub>2</sub> CO <sub>3</sub>                                      | <3                 | 21   |
| hydrothermal depolymerization | water                     | -                                                                    | <1                 | 22   |
| catalytic depolymerization    | -                         | sulfided<br>NiMoP/γ-Al <sub>2</sub> O <sub>3</sub>                   | <1                 | 23   |
| hydropyrolysis                | -                         | Pd/HZSM5                                                             | <4                 | 24   |

## References

1. M. Kleinert and T. Barth, *Chem. Eng. Technol.*, 2008, **31**, 736-745.
2. M. Kleinert and T. Barth, *Energy Fuels*, 2008, **22**, 1371-1379.
3. O. D. Mante, J. A. Rodriguez and S. P. Babu, *Bioresour. Technol.*, 2013, **148**, 508-516.
4. T. Yoshikawa, T. Yagi, S. Shinohara, T. Fukunaga, Y. Nakasaka, T. Tago and T. Masuda, *Fuel Process. Technol.*, 2013, **108**, 69-75.
5. T. Yoshikawa, S. Shinohara, T. Yagi, N. Ryumon, Y. Nakasaka, T. Tago and T. Masuda, *Appl. Catal. B-Environ*, 2014, **146**, 289-297.
6. X. M. Huang, T. I. Koranyi, M. D. Boot and E. J. M. Hensen, *Chemsuschem*, 2014, **7**, 2276-2288.
7. Z. Q. Ma, E. Troussard and J. A. van Bokhoven, *Appl. Catal. A-Gen*, 2012, **423**, 130-136.
8. J. A. Onwudili and P. T. Williams, *Green Chem.*, 2014, **16**, 4740-4748.
9. Q. Song, F. Wang, J. Y. Cai, Y. H. Wang, J. J. Zhang, W. Q. Yu and J. Xu, *Energy Environ. Sci.*, 2013, **6**, 994-1007.
10. W. Y. Xu, S. J. Miller, P. K. Agrawal and C. W. Jones, *Chemsuschem*, 2012, **5**, 667-675.
11. R. Beauchet, F. Monteil-Rivera and J. M. Lavoie, *Bioresour. Technol.*, 2012, **121**, 328-334.

12. J. H. Jae, G. A. Tompsett, Y. C. Lin, T. R. Carlson, J. C. Shen, T. Y. Zhang, B. Yang, C. E. Wyman, W. C. Conner and G. W. Huber, *Energy Environ. Sci.*, 2010, **3**, 358-365.
13. P. de Wild, R. Van der Laan, A. Kloekhorst and E. Heeres, *Environ. Prog. Sustain. Energy*, 2009, **28**, 461-469.
14. J. Zakzeski, A. L. Jongerius, P. C. A. Bruijninx and B. M. Weckhuysen, *Chemsuschem*, 2012, **5**, 1602-1609.
15. J. Zakzeski and B. M. Weckhuysen, *Chemsuschem*, 2011, **4**, 369-378.
16. Z. C. Jiang, T. He, J. M. Li and C. W. Hu, *Green Chem.*, 2014, **16**, 4257-4265.
17. A. Toledano, L. Serrano and J. Labidi, *J. Chem. Technol. Biot.*, 2012, **87**, 1593-1599.
18. J. X. Long, Y. Xu, T. J. Wang, Z. Q. Yuan, R. Y. Shu, Q. Zhang and L. Ma, *Appl. Energy*, 2015, **141**, 70-79.
19. X. Erdocia, R. Prado, M. A. Corcuera and J. Labidi, *Biomass Bioenerg.*, 2014, **66**, 379-386.
20. S. K. Singh and J. D. Ekhe, *RSC Adv.*, 2014, **4**, 27971-27978.
21. S. Kudo, Y. Hachiyama, Y. Takashima, J. Tahara, S. Idesh, K. Norinaga and J. Hayashi, *Energy Fuels*, 2014, **28**, 76-85.
22. T. L. K. Yong and Y. Matsumura, *Ind. Eng. Chem. Res.*, 2013, **52**, 5626-5639.
23. J. Horacek, F. Homola, I. Kubickova and D. Kubicka, *Catal. Today*, 2012, **179**, 191-198.
24. O. Jan, R. Marchand, L. C. A. Anjos, G. V. S. Seufitelli, E. Nikolla and F. L. P. Resende, *Energy Fuels.*, 2015, **29**, 1793-1800.
